# Supplementary material for: Virtual field trips as a tool for indirect geomorphological experience: A case study from the southeast part of the Gulf of Corinth, Greece
Source: Copernicus journal article supplement (doi:10.5194/gc-2021-8), 2021-04-08

Would you attend again a virtual fieldtrip?

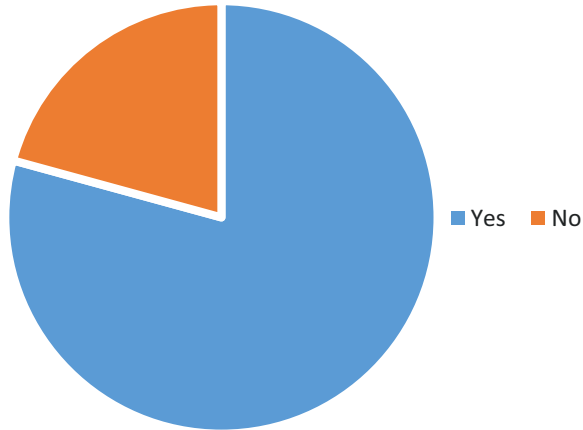

Why would you attend a virtual fieldtrip again?

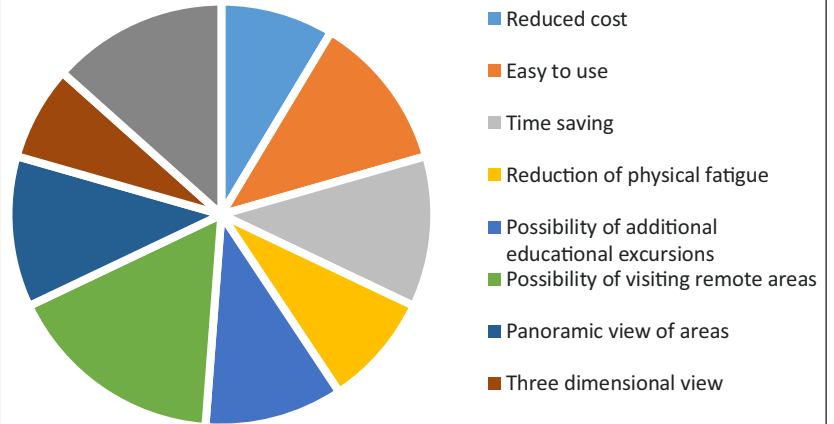

Would you use virtual fieldtrips instead of a powerpoint to educate to teach on a particular topic?

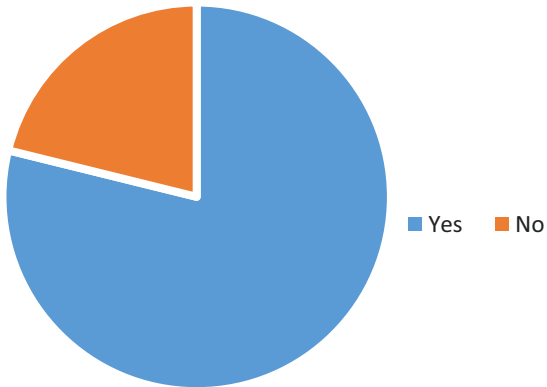

Do you think virtual fieldtrips can substitute real fieldtrips?

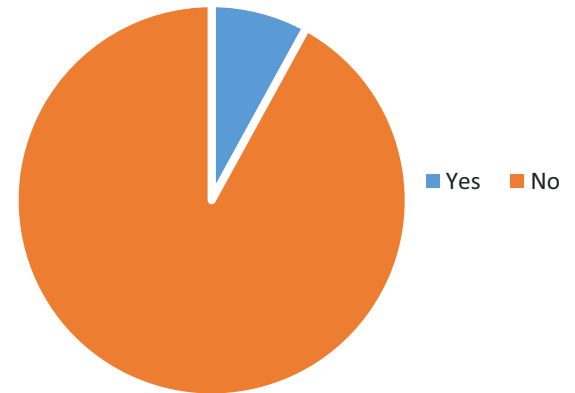

Supplement: Supplementary file [file gc-2021-8-AC1-supplement.pdf]
